# Supplementary material
Source: publisher figshare collection journal article supplement (https://acs.figshare.com/ndownloader/files/27071749)
Supplement: Supplementary file 1 [file 27071749]

## Supporting Information

# Reuse, Recycle and Regeneration of $\text{LiFePO}_4$ Cathode from Spent Lithium-ion Batteries for Rechargeable Lithium and Sodium-ion Storage

*Binitha Gangaja†, Shantikumar Nair† and Dhamodaran Santhanagopalan†\**

†Centre for Nanosciences, Amrita Vishwa Vidyapeetham, AIMS (P.O), Kochi – 682 041, India.

\*Corresponding Author email: [dsgopalan20710@aims.amrita.edu](mailto:dsgopalan20710@aims.amrita.edu)

Total number of pages: 12 (S1 – S12)

Number of figures: 17 (S1-S17)

Number of Tables: 1 (Table S1)

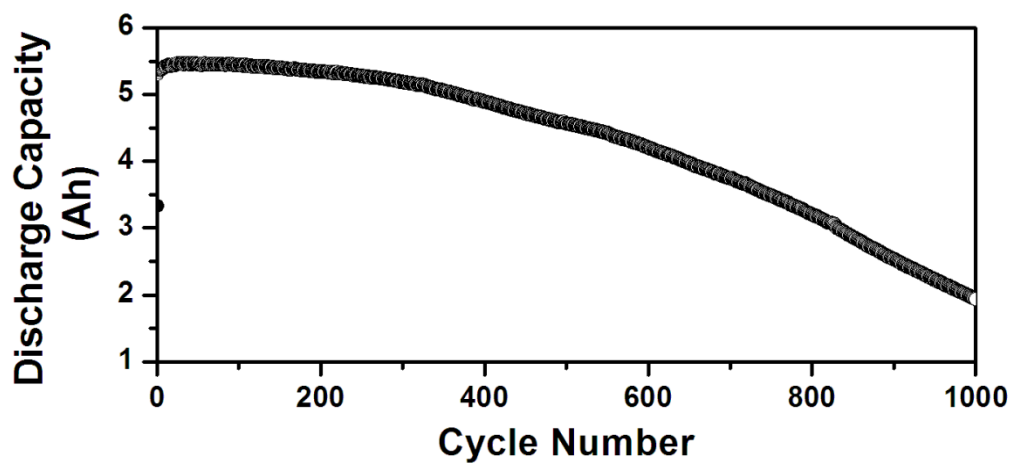

**Figure S1.** Cycling performance of the commercial cell for 1000 cycles at 5A current rate.

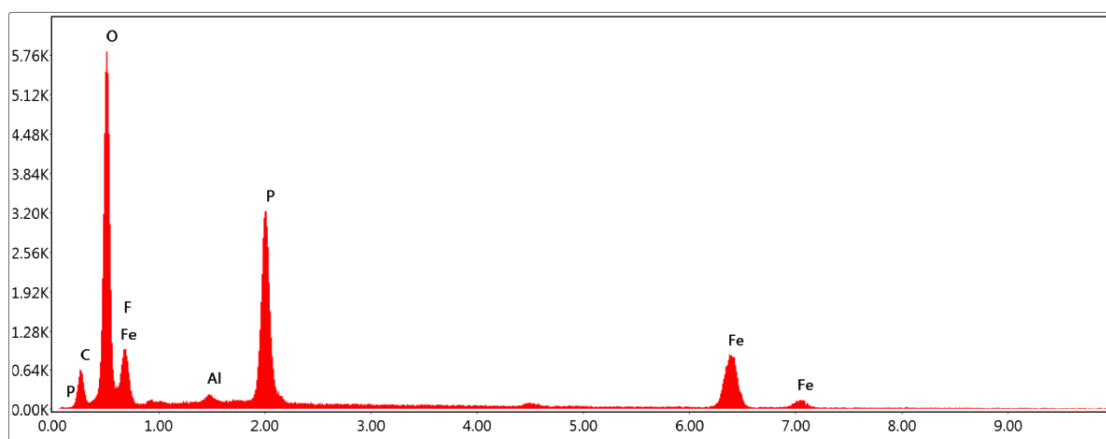

**Figure S2.** EDX spectra showing the presence of element Fe, P, O, F, C and Al.

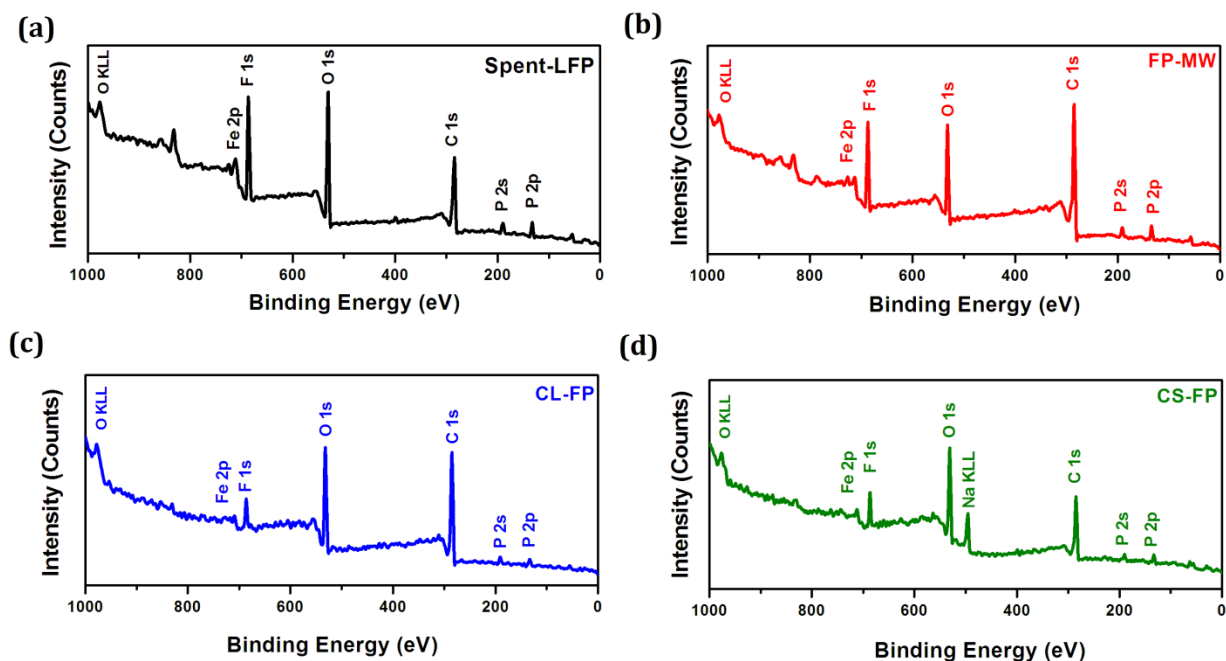

**Figure S3.** XPS survey spectrum (a) spent LFP, (b) FP-MW, (c) CL-FP and (d) CS-FP.

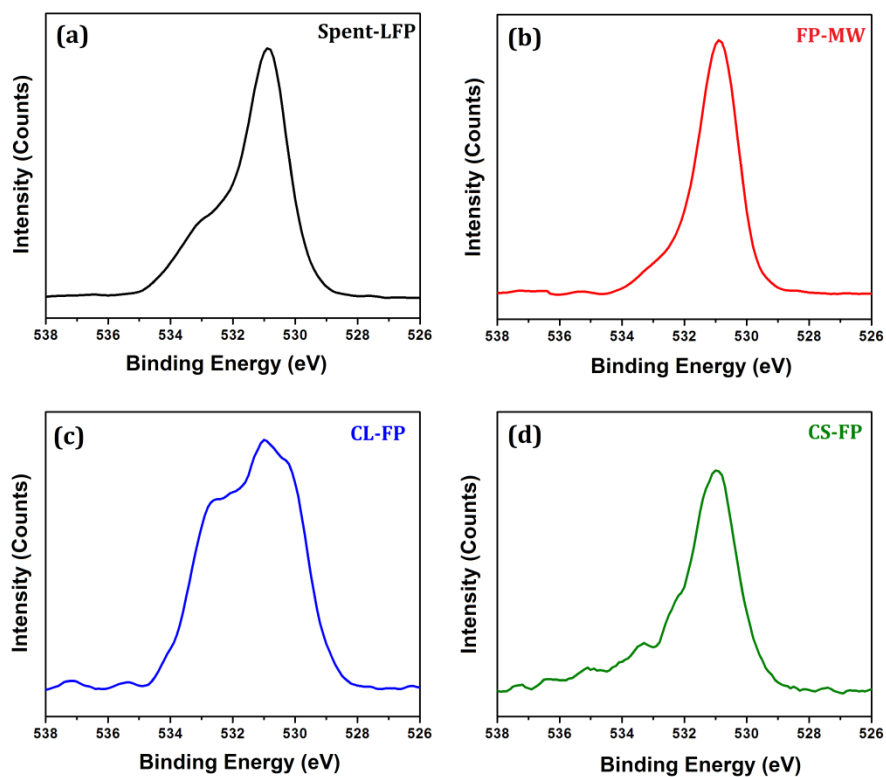

**Figure S4.** High resolution O 1s spectrum of (a) spent LFP, (b) FP-MW, (c) CL-FP and (d) CS-FP.

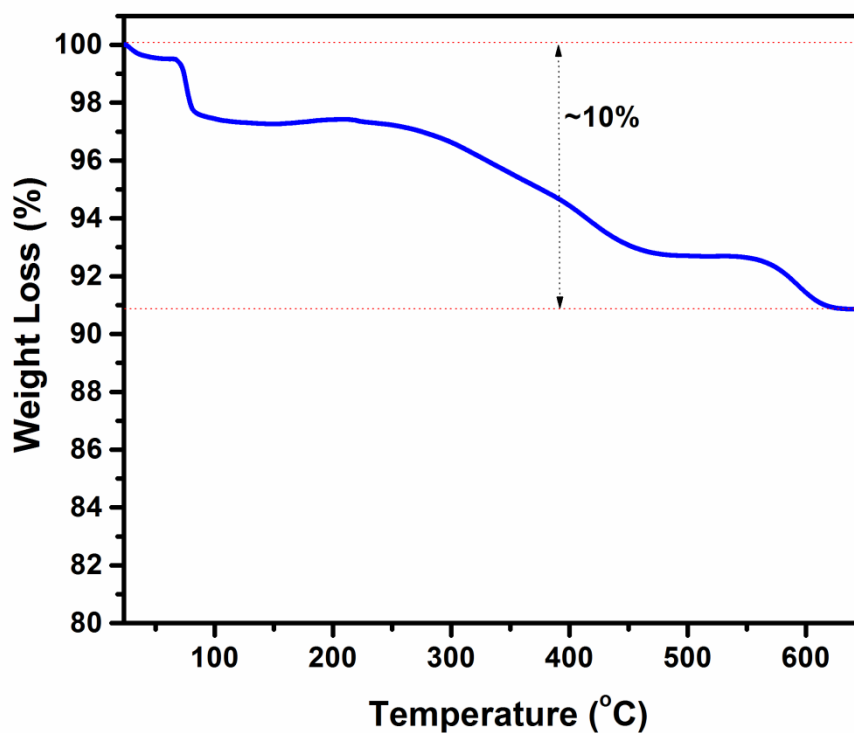

**Figure S5.** TGA analysis of the spent LFP electrode from 23°C to 650°C in air.

**Table S1.** Electrochemical performance comparison of fresh  $\text{LiFePO}_4$  cathodes available in literature with reused and recycled LFP cells

| SI No. | $\text{LiFePO}_4$ Sample details | C-Rate | Capacity (mAh/g) | Reference* |
|--------|----------------------------------|--------|------------------|------------|
| 1      | LFP                              | C/5    | 110              | 1          |
|        |                                  | 1C     | 80               |            |
|        | LFP + 1% Cu                      | C/5    | 140              |            |
|        |                                  | 1C     | 100              |            |
| 2      | C-LFP                            | C/10   | 145              | 2          |
|        |                                  | 10C    | 50               |            |
|        | C-LFP/7% Polypyrrole             | C/10   | 148              |            |
|        |                                  | 10C    | 100              |            |
| 3      | LFP Bare                         | C/10   | 146              | 3          |
|        |                                  | 5C     | 90               |            |
|        | LFP Surfactant                   | C/10   | 170              |            |
|        |                                  | 5C     | 142              |            |

|    |                |                    |      |           |
|----|----------------|--------------------|------|-----------|
| 4  | LFP            | C/10               | 132  | 4         |
|    |                | 5C                 | 83.4 |           |
| 5  | LFP            | C/10               | 118  | 5         |
|    | F-Doped LFP    | C/10               | 175  |           |
| 6  | LFP            | C/10               | 140  | 6         |
|    |                | 10C                | 70   |           |
| 7  | LFP @ Glucose  | LFP/Nanofibers     | C/10 | 7         |
|    |                |                    | 150  |           |
|    |                |                    | 10C  |           |
|    |                |                    | 80   |           |
| 8  | Commercial LFP | C/5                | 160  | 8         |
|    |                | 10C                | 100  |           |
|    |                | 1C                 | 130  |           |
| 9  | Recycled LFP   | 30C                | 60   | This work |
|    |                |                    |      |           |
|    |                | Self-assembled LFP | 1C   |           |
|    |                |                    | 150  |           |
| 10 | CL-FP          | 30C                | 110  | This work |
|    |                | 1C                 | 150  |           |
|    |                | 10C                | 95   |           |
| 10 | CL-FP          | 1C                 | 145  | This work |
|    |                | 10C                | 107  |           |

*\*References included at the end*

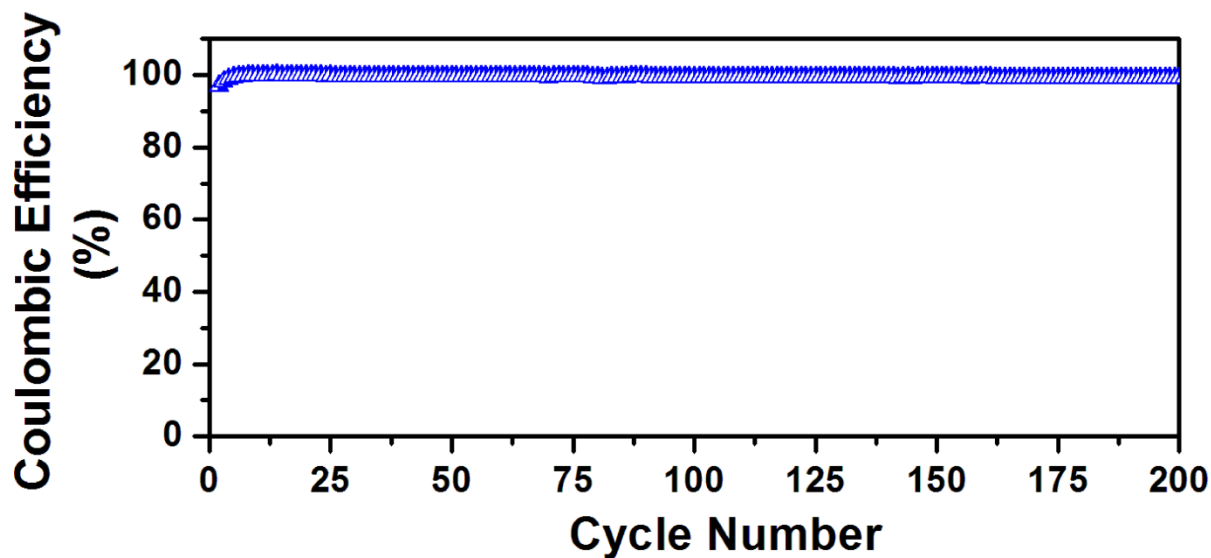

**Figure S6.** Coulombic Efficiency plot of reused spent-LFP LIB cell at 5C rate.

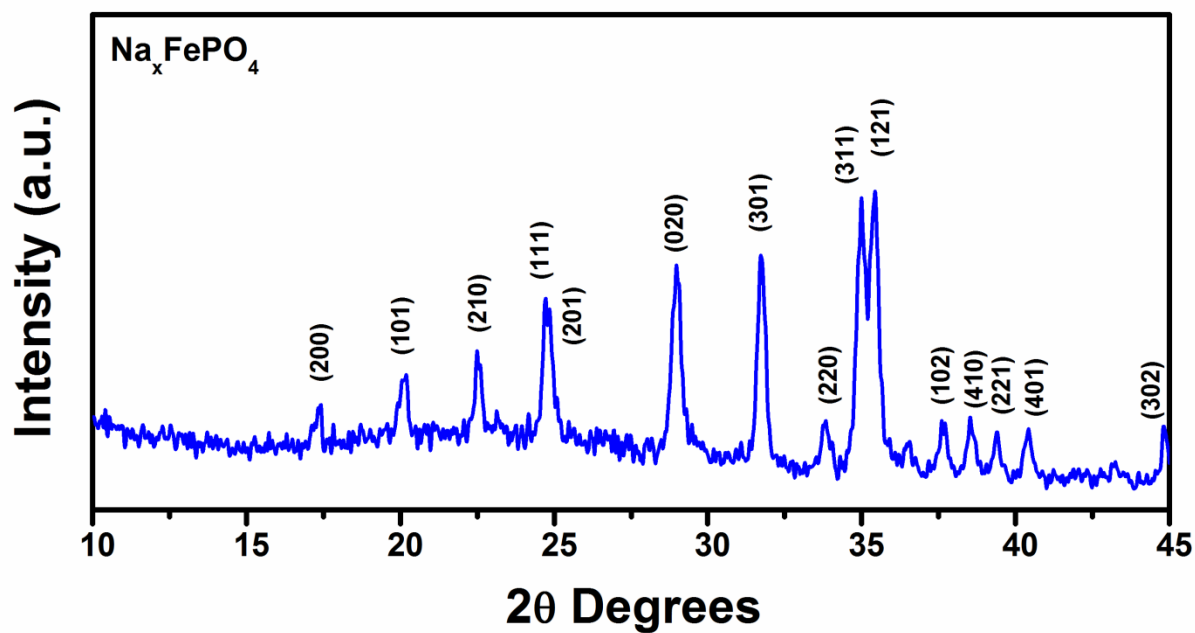

**Figure S7.** X-Ray diffraction pattern of electrochemically sodiated  $\text{Na}_x\text{FePO}_4$ .

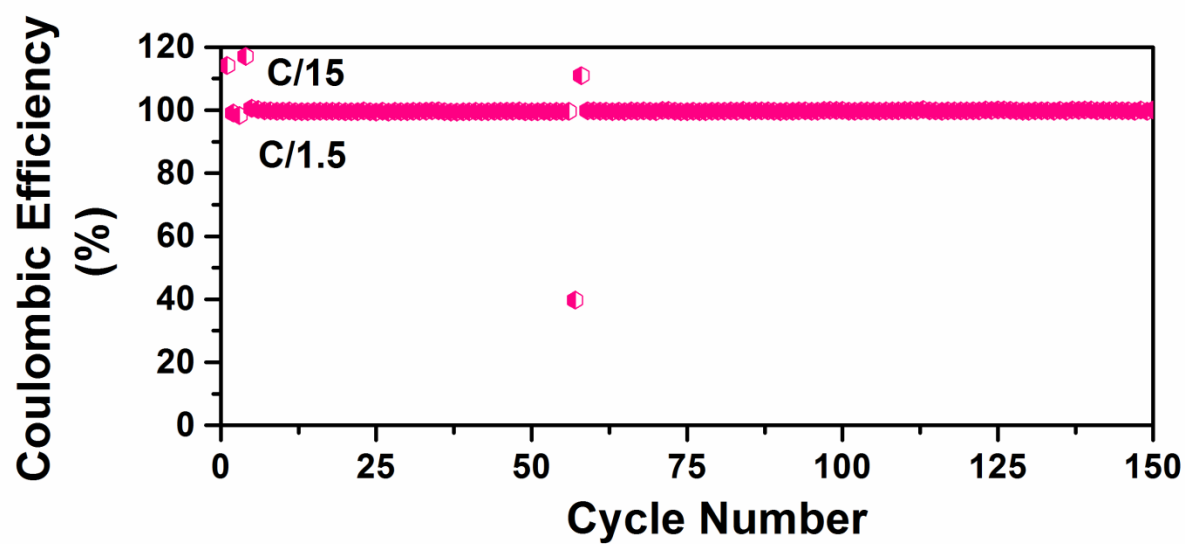

**Figure S8.** Coulombic Efficiency plot of MW processed FP-NIB cell, first 3 cycles at C/15 and then at C/1.5.

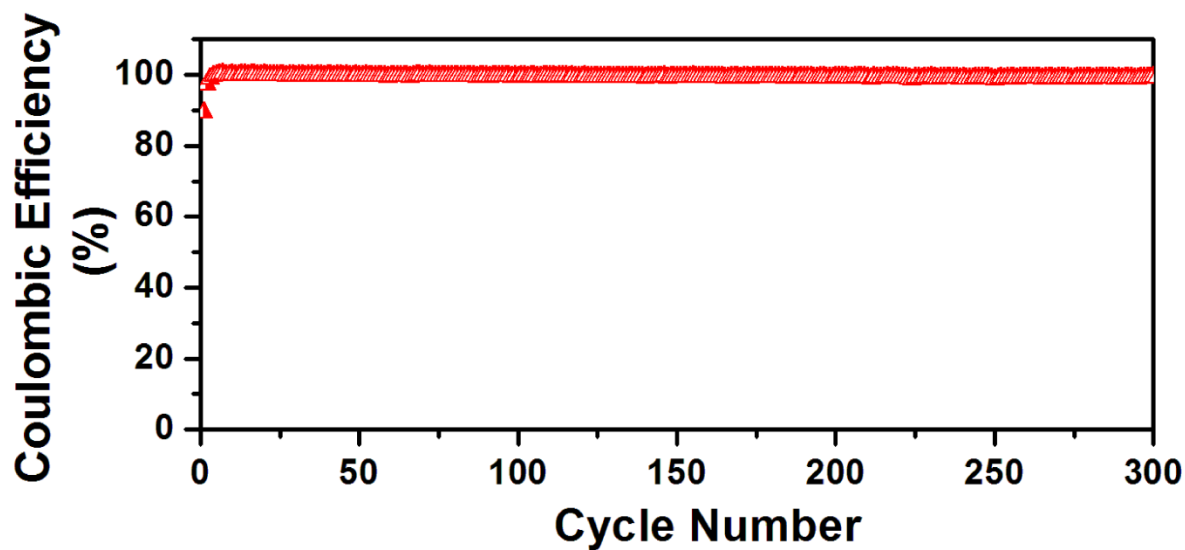

**Figure S9.** Coulombic Efficiency plot of LiI-FP LIB cell at 5C rate.

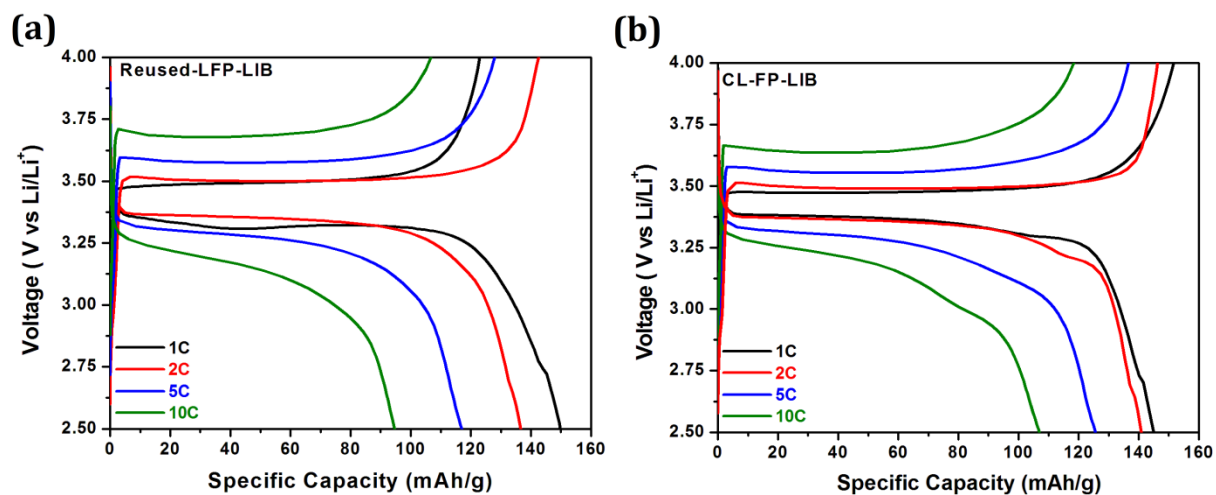

**Figure S10:** Lithium ion battery charge-discharge profiles of (a) reused-LIB and (b) CL-FP electrodes at different rates in the potential window from 2.5 V to 4V.

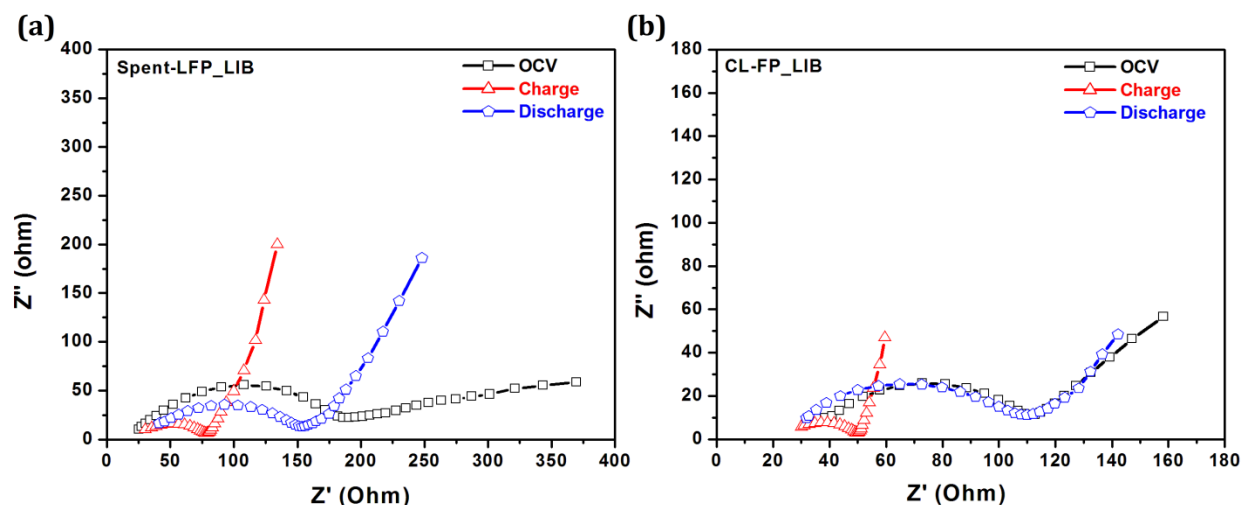

**Figure S11:** Electrochemical impedance analysis of (a) Spent-LFP and (b) CL-FP lithium ion cells in the frequency range from 10 kHz to 10 mHz at three different stages as indicated in legend.

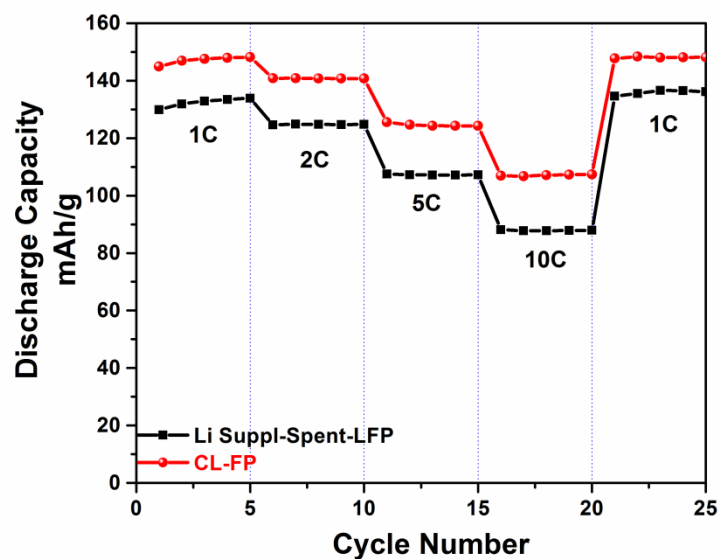

**Figure S12:** Rate performance comparison plot of lithium supplemented Spent-LFP and chemically lithiated FP.



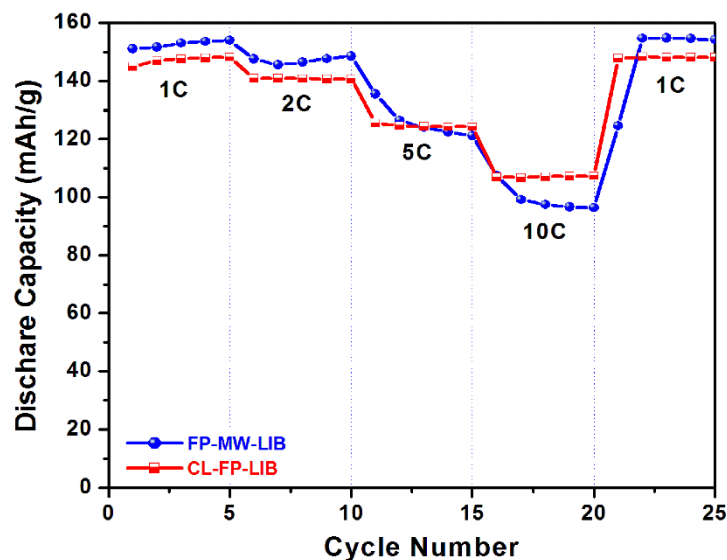

**Figure S13:** Rate performance plot of microwaved FP electrode (FP-MW) for lithium ion battery in comparison of chemically lithiated FP electrode. Rate performances were done at different rates (as shown in legend) for 5 cycles in the potential window from 2.5 V to 4V.

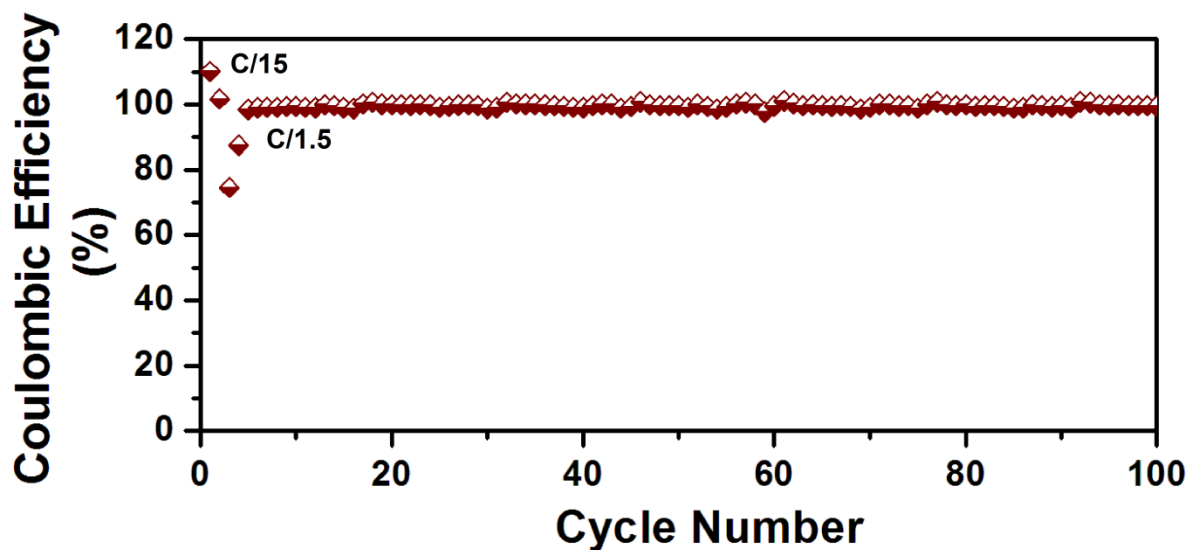

**Figure S14.** Coulombic Efficiency plot of NaI-FP sodium ion cell, first 3 cycles at C/15 and following cycles at C/1.5.

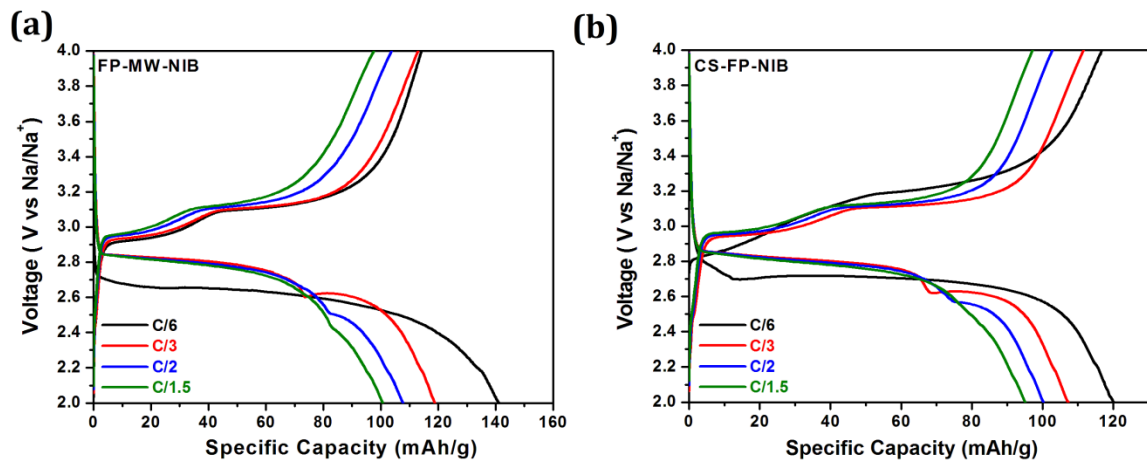

**Figure S15:** Sodium ion battery charge-discharge profiles of (a) FP-MW and (b) CS-FP electrodes at different rates from C/6 to C/1.5 as mentioned in the legend.

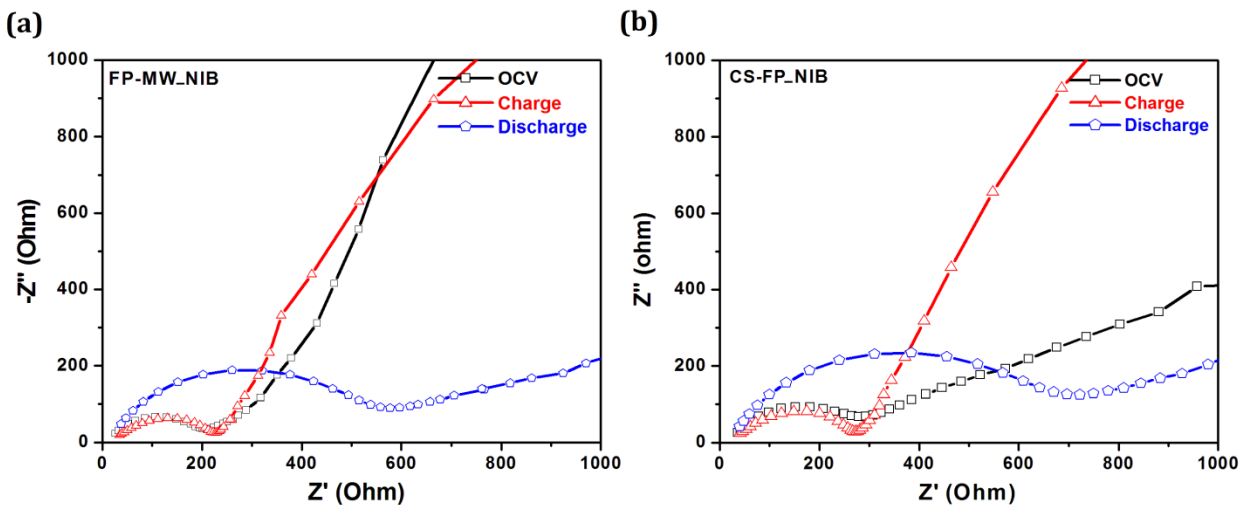

**Figure S16:** Electrochemical impedance analysis of (a) FP-MW and (b) CS-FP sodium ion cells in the frequency range from 10 kHz to 10 mHz at three different stages as indicated in legend.

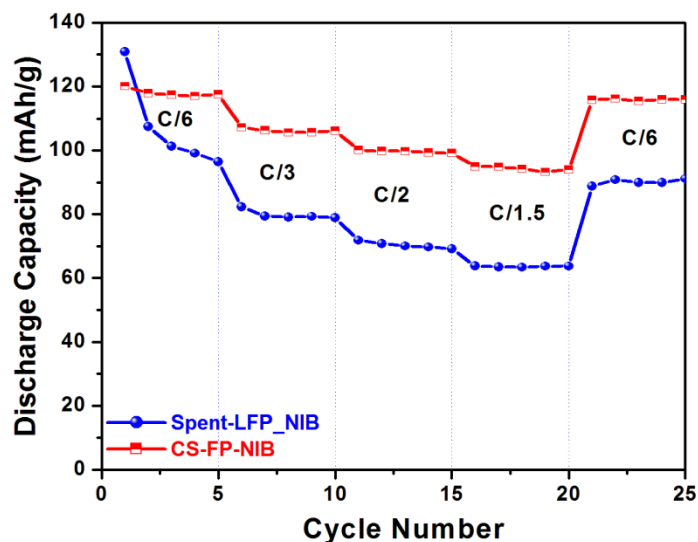

**Figure S17:** Rate performance plot of Spent-LFP electrode for sodium ion battery applications in comparison with CS-FP-NIB. The electrodes were cycled at different rates (as shown in legend) for 5 cycles in the potential window from 2.0 V to 4.0 V.

#### References:

- (1) Croce, F.; D'Epifanio, A.; Hassoun, J.; Deptula, A.; Olczac, T.; Scrosati, B. A Novel Concept for the Synthesis of an Improved  $\text{LiFePO}_4$  Lithium Battery Cathode. *Electrochem. Solid-State Lett.* **2002**, 5 (3), 47–50, DOI 10.1149/1.1449302.
- (2) Huang, Y. H.; Goodenough, J. B. High-Rate  $\text{LiFePO}_4$  Lithium Rechargeable Battery Promoted by Electrochemically Active Polymers. *Chem. Mater.* **2008**, 20 (23), 7237–7241, DOI 10.1021/cm8012304.
- (3) Choi, D.; Kumta, P. N. Surfactant Based Sol-Gel Approach to Nanostructured  $\text{LiFePO}_4$  for High Rate Li-Ion Batteries. *J. Power Sources* **2007**, 163 (2), 1064–1069, DOI 10.1016/j.jpowsour.2006.09.082.
- (4) Liu, Y.; Gu, Y.-J.; Luo, G.-Y.; Chen, Z.-L.; Wu, F.-Z.; Dai, X.-Y.; Mai, Y.; Li, J.-Q. Ni-Doped  $\text{LiFePO}_4/\text{C}$  as High-Performance Cathode Composites for Li-Ion Batteries. *Ceram. Int.* **2020**, 46 (10), 14857–14863, DOI 10.1016/j.ceramint.2020.03.011.
- (5) Wang, X.; Feng, Z.; Hou, X.; Liu, L.; He, M.; He, X.; Huang, J.; Wen, Z. Fluorine Doped Carbon Coating of  $\text{LiFePO}_4$  as a Cathode Material for Lithium-Ion Batteries. *Chem. Eng. J.* **2020**, 379 (July 2019), 122371, DOI 10.1016/j.cej.2019.122371.
- (6) Adepoju, A. A.; Williams, Q. L. High C-Rate Performance of  $\text{LiFePO}_4$ /Carbon Nanofibers Composite Cathode for Li-Ion Batteries. *Curr. Appl. Phys.* **2020**, 20 (1), 1–4, DOI 10.1016/j.cap.2019.09.014.
- (7) Yuan, M.; Li, Y.; Zhang, K.; Li, Y.; Yao, Y. One-Step Liquid Phase Synthesis of  $\text{LiFePO}_4@\text{C}$

Composite as High Performance Cathode Material for Lithium-Ion Batteries. *Nano* **2020**, *15* (06), 2050080, DOI 10.1142/S1793292020500800.

- (8) Peng, L.; Zhao, Y.; Ding, Y.; Yu, G. Self-Assembled LiFePO<sub>4</sub> Nanowires with High Rate Capability for Li-Ion Batteries. *Chem. Commun.* **2014**, *50* (67), 9569–9572, DOI 10.1039/c4cc04036h.
